# Supplementary material for: The c.1085A&gt;G Genetic Variant of CSF1R Gene Regulates Tumor Immunity by Altering the Proliferation, Polarization, and Function of Macrophages
Source: Oxford University Press journal article supplement (doi:10.1158/1078-0432.ccr-17-1007), 2017-07-19
Supplement: 10780432ccr171007-sup-181627_2_supp_4140980_ssmgsg.docx [file 10780432ccr171007-sup-181627_2_supp_4140980_ssmgsg.docx]

**Supplementary Table 1. Clinical characteristics of 52 patients of colorectal cancer.**

|  | ***CSF1R***  **c.1085 A_A**  **(n=21)** | ***CSF1R***  **c.1085 A_G**  **(n=31)** | **p** |
| --- | --- | --- | --- |
| **Gender** |  |  |  |
| Male | 12 | 14 | 0.57 |
| Female | 9 | 17 |  |
| **Stage** |  |  |  |
| II | 2 | 0 | 0.16 |
| III | 19 | 31 |  |
| **Surgical resection** |  |  |  |
| Yes | 21 | 31 | 1.0 |
| No | 0 | 0 |  |
| **Adjuvant chemotherapy**a |  |  |  |
| Yes | 21 | 31 | 1.00 |
| No | 0 | 0 |  |
| ***RAS* gene**b |  |  |  |
| Wild type | 9 | 18 | 0.40 |
| Mutant | 12 | 13 |  |

amFOLFOX6; bincluding *KRAS* and *NRAS*.
