# Supplementary material for: The c.1085A&gt;G Genetic Variant of CSF1R Gene Regulates Tumor Immunity by Altering the Proliferation, Polarization, and Function of Macrophages
Source: Oxford University Press journal article supplement (doi:10.1158/1078-0432.ccr-17-1007), 2017-07-19
Supplement: 10780432ccr171007-sup-181627_2_supp_4140982_ksmgkg.pdf [file 10780432ccr171007-sup-181627_2_supp_4140982_ksmgkg.pdf]

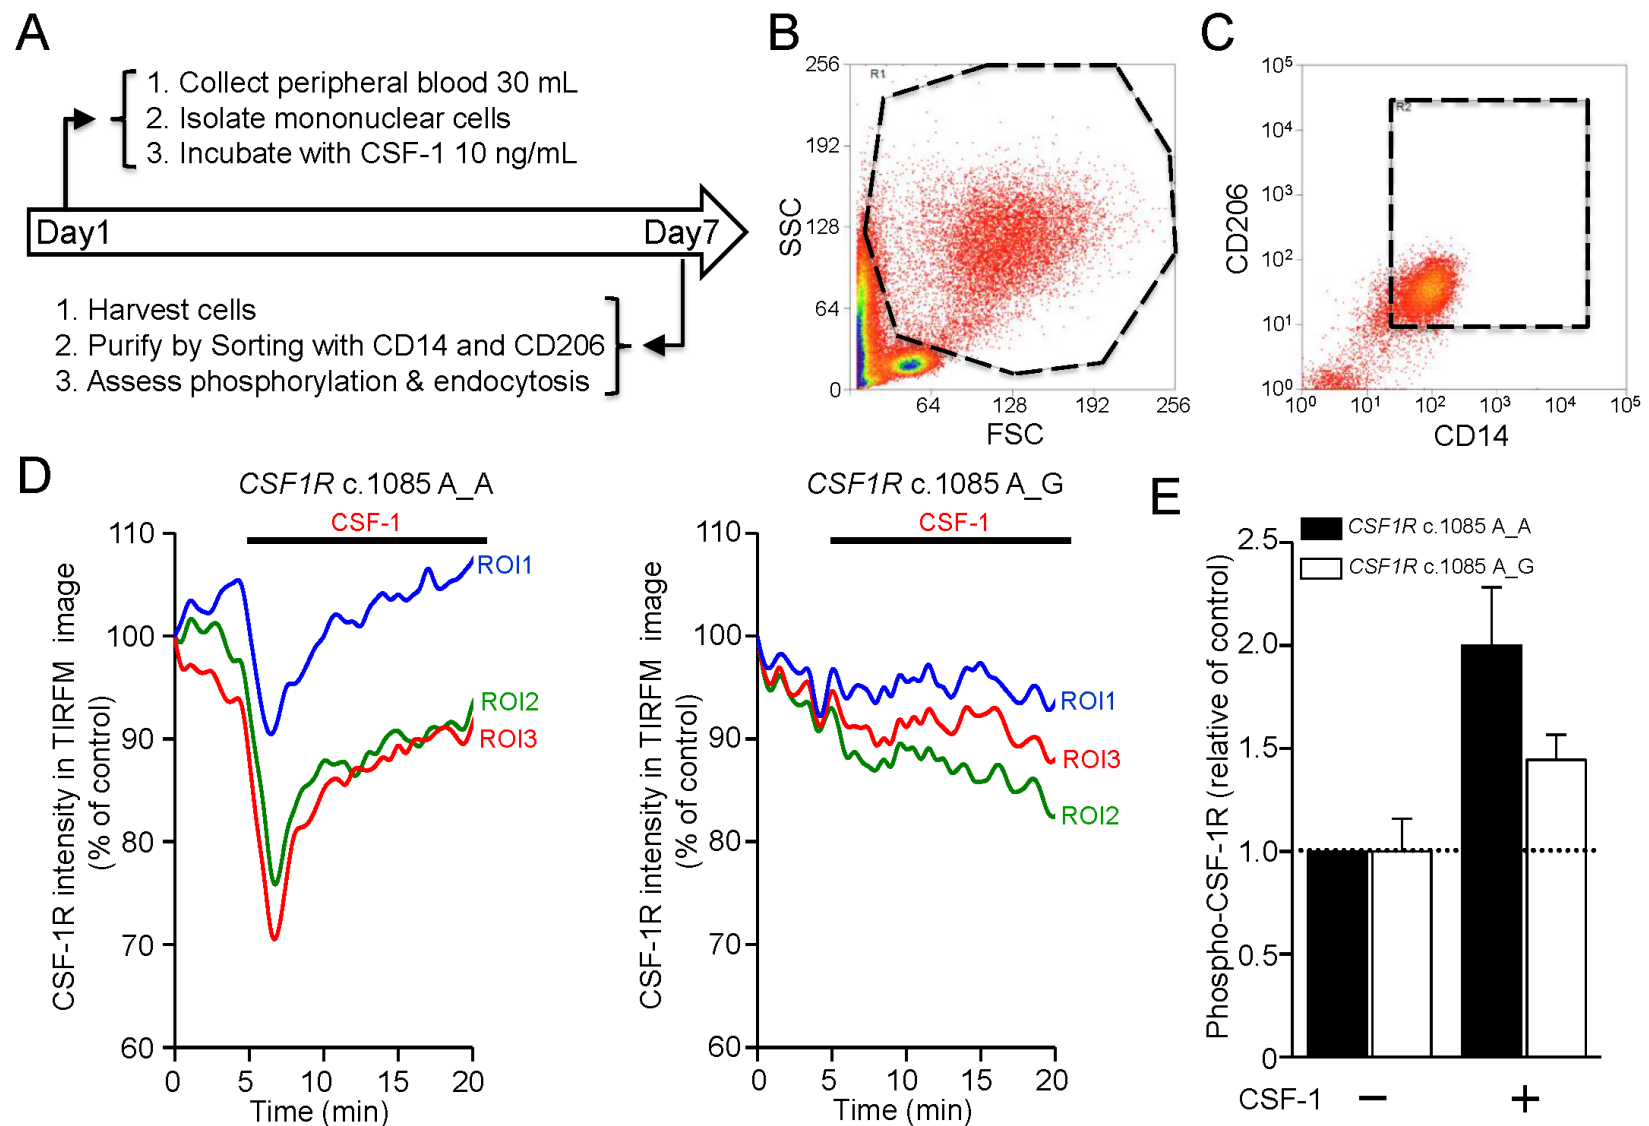

**Supplementary Figure S5.** **A**, The protocol showing the differentiation and purification of macrophages. **B**, After cells differentiated from peripheral blood mononuclear cells were harvested, forward scatter (FSC) and side scatter (SSC) were used to gate the population of macrophages (the population enclosed by dotted line). **C**, CD14 and CD206 were used to purify the mature macrophages (the population enclosed by dotted line). **D**, Macrophages were stained with anti-CSF-1R-GFP antibody. A representative result showing the changes of CSF-1R-GFP fluorescent intensity in macrophages with *CSF1R* c.1085 A\_A and A\_G monitored by TIRFM once per 30 second. **E**, After serum starvation for 18 hours, macrophages were stimulated by CSF-1 100 ng/mL for 5 minutes. Quantitative analyses of CSF-1R phosphorylation were measured by Phospho-MCSF-Receptor sandwich ELISA kit. Each column represented mean  $\pm$  SEM from at least 3 different experiments. ROI, region of interest.
